# Supplementary material for: The Role of ZNF275/AKT Pathway in Carcinogenesis and Cisplatin Chemosensitivity of Cervical Cancer Using Patient-Derived Xenograft Models
Source: MDPI journal article supplement (doi:10.3390/cancers15235625), 2023-11-28
Supplement: s1 [file s1]

Article

# The role of ZNF275/AKT pathway in carcinogenesis and cisplatin chemosensitivity of cervical cancer using patient-derived xenograft models

Miaomiao Ye<sup>1,†</sup>, Tingxian Liu<sup>1,†</sup>, Liqing Miao<sup>1</sup>, Shuangwei Zou<sup>1</sup>, Huihui Ji<sup>1</sup>, Jian'an Zhang<sup>1,\*</sup>, Xueqiong Zhu<sup>1,\*</sup>

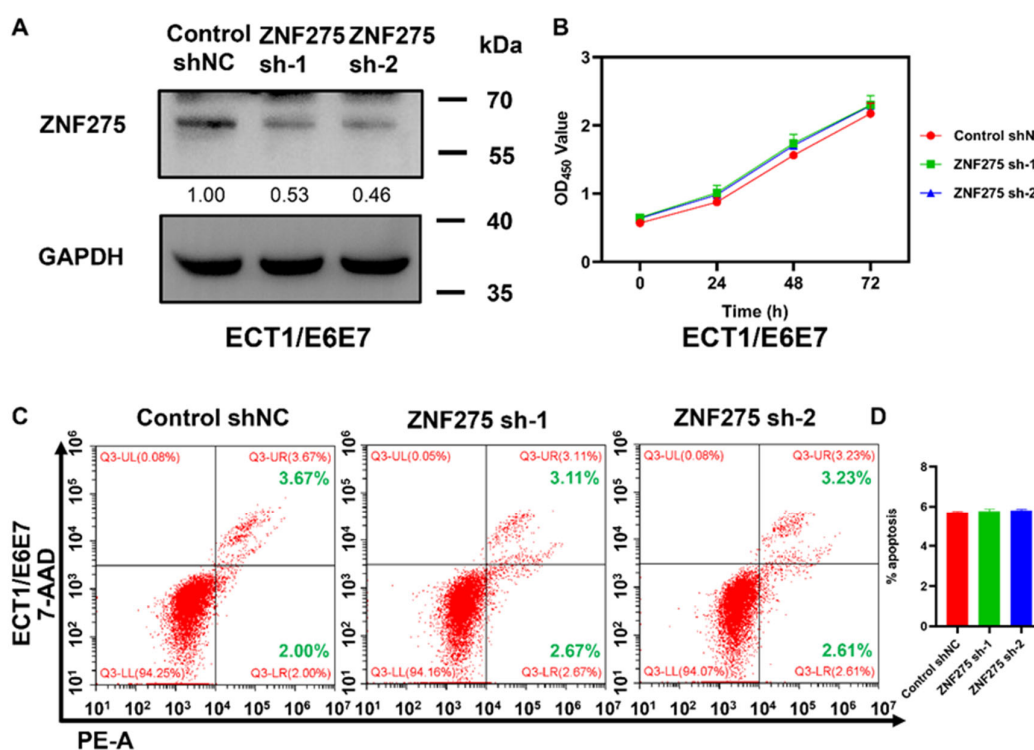

**Figure S1.** The effect of ZNF275 knockdown on viability and apoptosis of ECT1/E6E7 cells. A: The efficiencies of ZNF275 knockdown in ECT1/E6E7 cells were validated by Western blotting. B: CCK-8 assay revealed the effect of ZNF275 downregulation on viabilities of ECT1/E6E7 cells. C: Flow cytometric analysis revealed the effect of ZNF275 downregulation on apoptosis of ECT1/E6E7 cells. D: Quantitative analysis of the results of C.
